# In-field genetic stock identification of overwintering coho salmon in the Gulf of Alaska: Evaluation of Nanopore sequencing for remote real-time deployment

Christoph M. Deeg<sup>1</sup>, Ben J. G. Sutherland<sup>2</sup>, Tobi J. Ming<sup>2</sup>, Colin Wallace<sup>2</sup>, Kim Jonsen<sup>2</sup>, Kelsey L. Flynn<sup>2</sup>, Eric B. Rondeau<sup>2</sup>, Terry D. Beacham<sup>2</sup>, and Kristina M. Miller<sup>1,2</sup>

1: Forest and Conservation Sciences, University of British Columbia, Vancouver, BC, Canada

2: Fisheries and Oceans Canada, Pacific Biological Station, Nanaimo, BC, Canada

## Abstract:

Genetic stock identification (GSI) by single nucleotide polymorphism (SNP) sequencing has become the gold standard for stock identification in Pacific salmon, which are found in mixed-stocks during the oceanic phase of their lifecycle. Sequencing platforms currently applied require large batch sizes and multi-day processing in specialized facilities to perform genotyping by the thousands. However, recent advances in third-generation single-molecule sequencing platforms, like the Oxford Nanopore minION, provide base calling on portable, pocket-sized sequencers and hold promise for the application of real-time, in-field stock identification on variable batch sizes. Here we report and evaluate utility and comparability of at-sea stock identification of coho salmon *Oncorhynchus kisutch* based on targeted SNP amplicon sequencing on the minION platform during the International Year of the Salmon Signature Expedition to the Gulf of Alaska in the winter of 2019. Long read sequencers are not optimized for short amplicons, therefore we concatenate amplicons to increase coverage and throughput. Nanopore sequencing at-sea yielded stock assignment for 50 of the 80 assessed individuals. Nanopore-based SNP calls agreed with Ion Torrent based genotypes in 83.25%, but assignment of individuals to stock of origin only agreed in 61.5% of individuals highlighting inherent challenges of Nanopore sequencing, such as resolution of homopolymer tracts and indels. However, poor representation of assayed coho salmon in the queried baseline dataset contributed to poor assignment confidence on both platforms. Future improvements will focus on lowering turnaround time, accuracy, throughput, and cost, as well as augmentation of the existing baselines, specifically in stocks from coastal northern BC and Alaska. If successfully implemented, Nanopore sequencing will provide an alternative method to the large-scale laboratory approach. Genotyping by amplicon sequencing in the hands of diverse stakeholders could inform management decisions over a broad expanse of the coast by allowing the analysis of small batches in remote areas in near real-time.

## 33 Introduction:

34 The semelparous and anadromous life history of Pacific salmon makes them crucial to coastal and  
35 terrestrial ecosystems around the North Pacific by connecting oceanic and terrestrial food webs and nutrient  
36 cycles (Cederholm et al. 1999). Salmon are highly valued by the northern Pacific Rim nations due to their  
37 significant contribution to commercial and recreational fishing harvests as well as their cultural importance,  
38 especially amongst Indigenous peoples (Lichatowich 2001). Despite this significance, many wild Pacific salmon  
39 stocks have experienced population declines due to a combination of compounding factors such as  
40 overexploitation, spawning habitat alterations, pathogens and predators, prey availability, and climate change  
41 (Miller et al. 2014). Efforts to rebuild stocks include habitat restoration, artificial stock enhancements, as well  
42 as stock specific monitoring through a number of assessment methods to inform targeted management  
43 strategies (Hinch et al. 2012). These monitoring strategies include spawning escapement and smolt survival  
44 assessments as well as test fisheries in riverine and coastal waters (Woodey 1987). While these tools allow the  
45 assessment of health and productivity of individual stocks and therefore the targeted management of individual  
46 populations in North American coastal and riverine environments, the open ocean phase of the life cycle of  
47 Pacific salmon remains poorly studied despite the observed large temporal shifts in marine survival over recent  
48 decades (Holtby, Andersen, and Kadowaki 1990). Compounding this issue, Pacific salmon are usually found in  
49 mixed-stock schools in the ocean, meaning that fish from home streams as distant as North America and Asia  
50 might be found in the same school, making stock-specific management challenging (Wood, Rutherford, and  
51 McKinnell 1989).

52 To overcome the challenges of mixed-stock management, stock identification has in the distant past  
53 utilized characteristic scale and parasite patterns, as well as the marking of hatchery-enhanced fish by coded-  
54 wire tagging (Wood, Rutherford, and McKinnell 1989; Cook and Guthrie 1987; Jefferts, Bergman, and Fiscus  
55 1963). More recently, genetic stock identification (GSI) using minisatellite, microsatellite, and ultimately single  
56 nucleotide polymorphisms (SNPs) as markers has proven superior in delivering high-throughput insights into  
57 the stock composition of salmon (Beacham et al. 2017, 2018; Miller, Withler, and Beacham 1996). Specifically,  
58 the large baseline of population-specific SNP frequencies and targeted amplification of such loci now allow for  
59 unprecedented resolution of stock origin in many species of salmon at reduced biases (Beacham et al. 2018,  
60 2017; Ozerov et al. 2013; Gilbey et al. 2017). However, current sequencing approaches, based on second  
61 generation sequencing platforms (e.g. illumina and Ion Torrent), mean that only sequencing large batches of  
62 individuals, known as “genotyping by the thousands” (GT-seq), is economically and practically feasible  
63 (Beacham et al. 2017, 2018; Campbell, Harmon, and Narum 2015). These approaches require a specialized  
64 laboratory and several days turnover for the library preparation and sequencing, even under highly automated  
65 settings. These constraints limit the utility of SNP-based GSI for spatially or temporally restricted assessments  
66 because samples need to be transported to the laboratory for analysis, as has been the case for all GSI methods  
67 to date. Specifically, for time-sensitive stock-specific harvest management decisions, an in-field real-time SNP-  
68 based GSI approach with greater flexibility in sample batch size would be desirable.

69 Recent advances in third-generation single-molecule sequencing platforms like the Oxford Nanopore  
70 minION allow real-time sequencing on a pocket-sized portable sequencer that requires little library  
71 preparation, therefore enabling sequencing in remote locations (Mikheyev and Tin 2014; Quick et al. 2016).  
72 However, several technical hurdles to adapting Nanopore sequencing to SNP GSI exist. While Nanopore  
73 sequencing can yield extremely long reads, the number of sequencing pores and their loading is limited,  
74 resulting in low throughput when sequencing short reads, such as amplicons. An additional problem is the  
75 relatively high error rate inherent to this novel technology. Since the SNP GSI protocols are based on the  
76 amplification of short amplicons via targeted multiplex PCR, sequencing throughput of such short amplicons  
77 on the Nanopore platform is comparatively low, as the number of sequencing pores is the rate limiting factor.  
78 This is especially problematic since high coverage is needed to compensate for the higher error rate of  
79 Nanopore generated sequences. A promising approach to overcome these limitations is the concatenation of  
80 PCR amplicons that allows the sequencing of several amplicons within a single read, thereby exponentially  
81 increasing throughput for genotyping (Cornelis et al. 2017; Schlecht et al. 2017).

82 Here, we report on the development and performance of a novel Nanopore-based in-field SNP GSI  
83 method by adapting existing SNP GSI technology to the Nanopore platform using a concatenation approach  
84 (Schlecht et al. 2017). We aim to demonstrate in-field feasibility, repeatability and comparability to established

85 platforms. As a proof of concept, in-field stock ID was performed in the Gulf of Alaska onboard the research  
86 vessel *Professor Kaganovsky* during the IYS expedition in February and March of 2019.

87

## 88 Materials and Methods:

### 89 Field Lab equipment and workspace

90 The field equipment onboard the *Professor Kaganovsky* research trawler consisted of a PCR  
91 thermocycler, a mini-plate centrifuge, a microcentrifuge, a Qubit fluorimeter (Thermo Fisher), a vortexer, a  
92 minION sequencer, a laptop with an Ubuntu operating system (Ubuntu v.14.06), as well as assorted pipettes  
93 and associated consumables like filter tips (Figure 1). The required infrastructure onboard included a 4°C  
94 fridge, a -20°C freezer, a power supply, as well as a physical workspace. The entire equipment configuration  
95 required was under \$10,000 CAD.

96

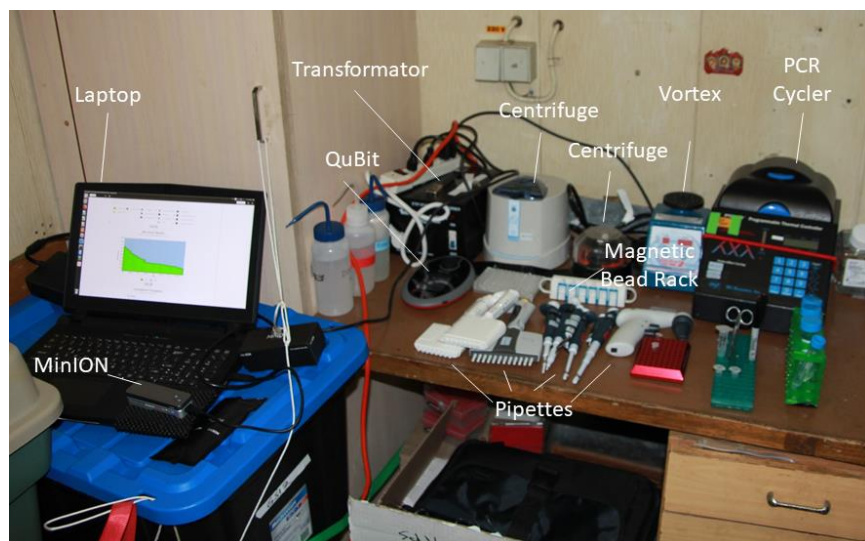

97  
98 *Figure 1: Workspace aboard the Professor Kaganovsky vessel during the International Year of the salmon signature*  
99 *expedition.*

### 100 Tissue sample collection and DNA extraction

101 Salmon were captured by the research trawler *Professor Kaganovsky* during the 2019 International  
102 Year of the Salmon (IYS) Signature expedition in the Gulf of Alaska (Figure 2). We collected fin clips of coho  
103 salmon (*Oncorhynchus kisutch*) and froze them individually until DNA extraction, or immediately processed  
104 once a suitable batch size had been accumulated. DNA extraction from 2 x 2 x 2mm fin-tissue clips was  
105 performed in a 96-well PCR plate using 100µl of QuickExtract solution (Lucigen, USA) according to the  
106 manufacturer's instructions.

### 107 Multiplex PCR and Barcoding

108 Multiplex PCR with a custom panel of primers targeting 299 loci of known SNPs was performed using  
109 0.25µl of DNA extract as template using the AgriSeq HTS Library Kit Amplification Mix PCR mastermix  
110 (ThermoFisher) in a 10µl reaction according to Beacham et al. (Beacham et al. 2017). Next, we prepared  
111 amplicons for ligation by end-prepping amplified strands with AgriSeq HTS Library Kit Pre-ligation Enzyme.  
112 ONT barcode adapters (PCR Barcoding Expansion 1-96, EXP-PBC096, Oxford Nanopore Technologies, UK)  
113 were then ligated to the amplicons by blunt-end ligation with the Barcoding Enzyme/Buffer of the AgriSeq HTS  
114 Library Kit according to manufacturer's instruction. After bead-cleanup (1.2:1 bead:sample, AMPure XP beads,  
115 Beckman Coulter, USA) we added the ligation products, barcodes and barcoding adapters (PCR Barcoding  
116 Expansion 1-96, EXP-PBC096, Oxford Nanopore Technologies, UK) by PCR using Q5 polymerase mastermix  
117 (NEB, USA) for individual fish identification according to manufacturer's protocol in a 25µl reaction (98°C for  
118 3 min; 25 cycles of 98°C for 10 s, 70°C for 10 s, 72°C for 25 s; 72°C for 2 min). Barcoded libraries were then

119 pooled and cleaned using 1.2:1 bead cleanup, before DNA yield of a subset of samples (12.5%) was analyzed by  
120 Qubit (dsDNA HS Assay Kit, ThermoFisher, USA).  
121

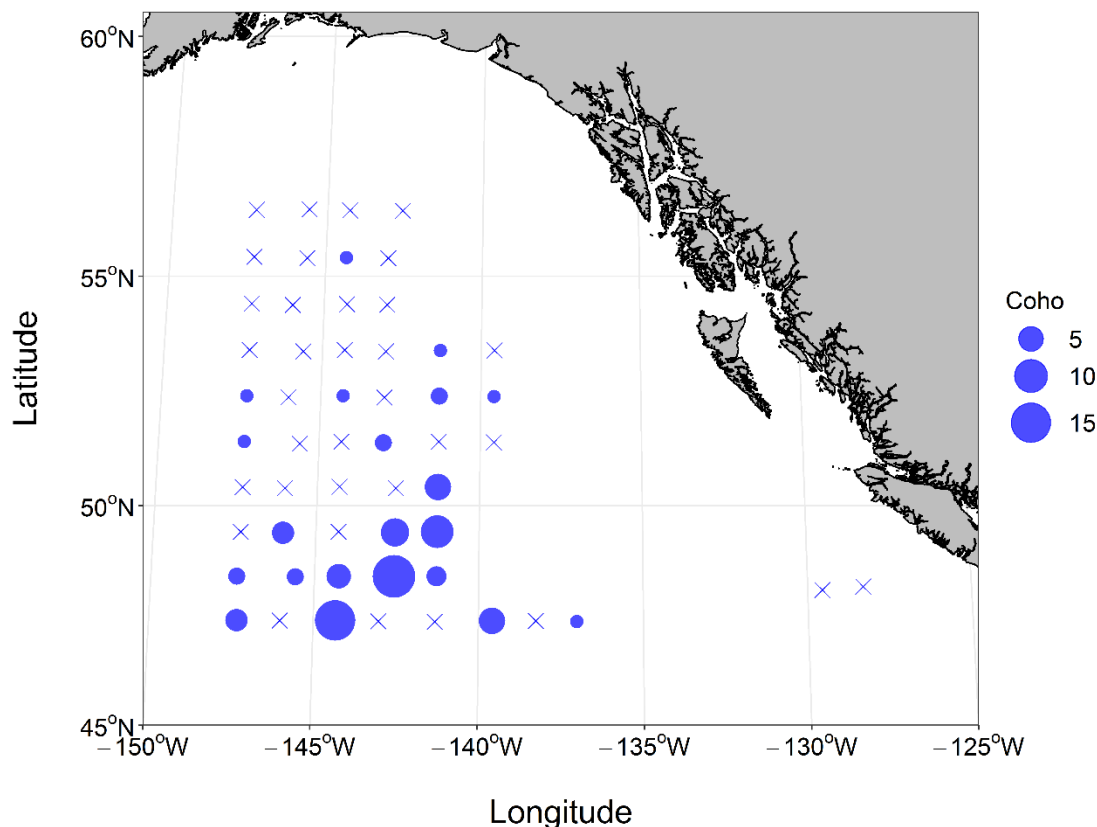

122  
123 *Figure 2: Coho salmon capture numbers and location during the International Year of the Salmon Gulf of Alaska expedition. Size*  
124 *of circles corresponds to catch size, X indicates a trawl without coho capture.*

## 125 126 Amplicon concatenation

127 To improve throughput on the minION, we concatenated amplicons using inverse complementary  
128 adapters (Figure 3). After end prep using Ultra II End Repair/da-Tailing Module Module (NEB, USA), the library  
129 was split into two equal volume subsets. Custom inverse complementary adapters that had inverse  
130 complementary terminal modifications to ensure unidirectional ligation (3'-T overhang and 5'  
131 phosphorylation) were ligated onto both ends of the respective subsets using the Ultra II Ligation Module (NEB,  
132 USA) according to manufacturer's instructions and purified with 1:1 bead cleanup (Figure 3). The custom  
133 adapters were adapted from Schlecht et al (Schlecht et al. 2017): Adapter A: 5'-P-  
134 ACAGCGAGTTATCTACAGTTCTTCAATGT + ACATTGAAGAACCTGTAGATAACTCGCTGTT ;  
135 Adapter B: 5'-P-ACATTGAAGAACCTGTAGATAACTCGCTGT + ACAGCGAGTTATCTACAGTTCTTCAATGTT).  
136 Amplicons with adapters added to them were subsequently amplified again with a single primer (5μl;  
137 ACATTGAAGAACCTGTAGATAACTCGCTGTT for adapter A, ACAGCGAGTTATCTACAGTTCTTCAATGTT for  
138 adapter B) in 25μl Q5 reactions according to manufacturer's instructions with the following thermal regime:  
139 98°C for 3 min; 30 cycles of 98°C for 10 s, 68°C for 15 s, 72°C for 20 s; 72°C for 2 min). After 1:1 bead cleanup,  
140 we pooled both subsets in equimolar ratios after Qubit quantification to verify both reactions worked, and then  
141 subjected to a primer-free, PCR-like concatenation due to heterodimer annealing and elongation in 25μl Q5  
142 reaction, using the complementary adapter sequence ligated onto the amplicons as primers cycled under the  
143 following thermal regime: 3 cycles of 98°C for 10 s, 68°C for 30 s, 72°C for 20 s; followed by 3 cycles of 98°C for  
144 10 s, 68°C for 30 s, 72°C for 30 s; followed by 3 cycles of 98°C for 10 s, 68°C for 30s, 72°C for 40s; followed by 3  
145 cycles of 98°C for 10 s, 68°C for 30 s, 72°C for 50s; and finally followed by 72°C for 2 min (Figure 3).  
146

147 **Library Preparation and sequencing**

148 The concatenated amplicons were prepared for Nanopore sequencing using the ONT Ligation  
 149 Sequencing Kit (LSK109) according to the manufacturer's instruction. In brief, after end-prep using the Ultra II  
 150 Endprep Module and bead cleanup, we ligated proprietary ONT sequencing adapters onto the concatenation  
 151 adapters by blunt-end ligation using the proprietary ONT Buffer and the TA quick ligase (NEB, USA; note: this  
 152 standard sequencing step not shown in Figure 3). After additional bead-cleanup and washing with the short  
 153 fragment buffer (SFB: ONT, UK) according to the manufacturer's protocol, we loaded the library onto a freshly  
 154 primed flow cell (MIN 106 R9.4.1: ONT, UK) according to the manufacturer's instruction.  
 155

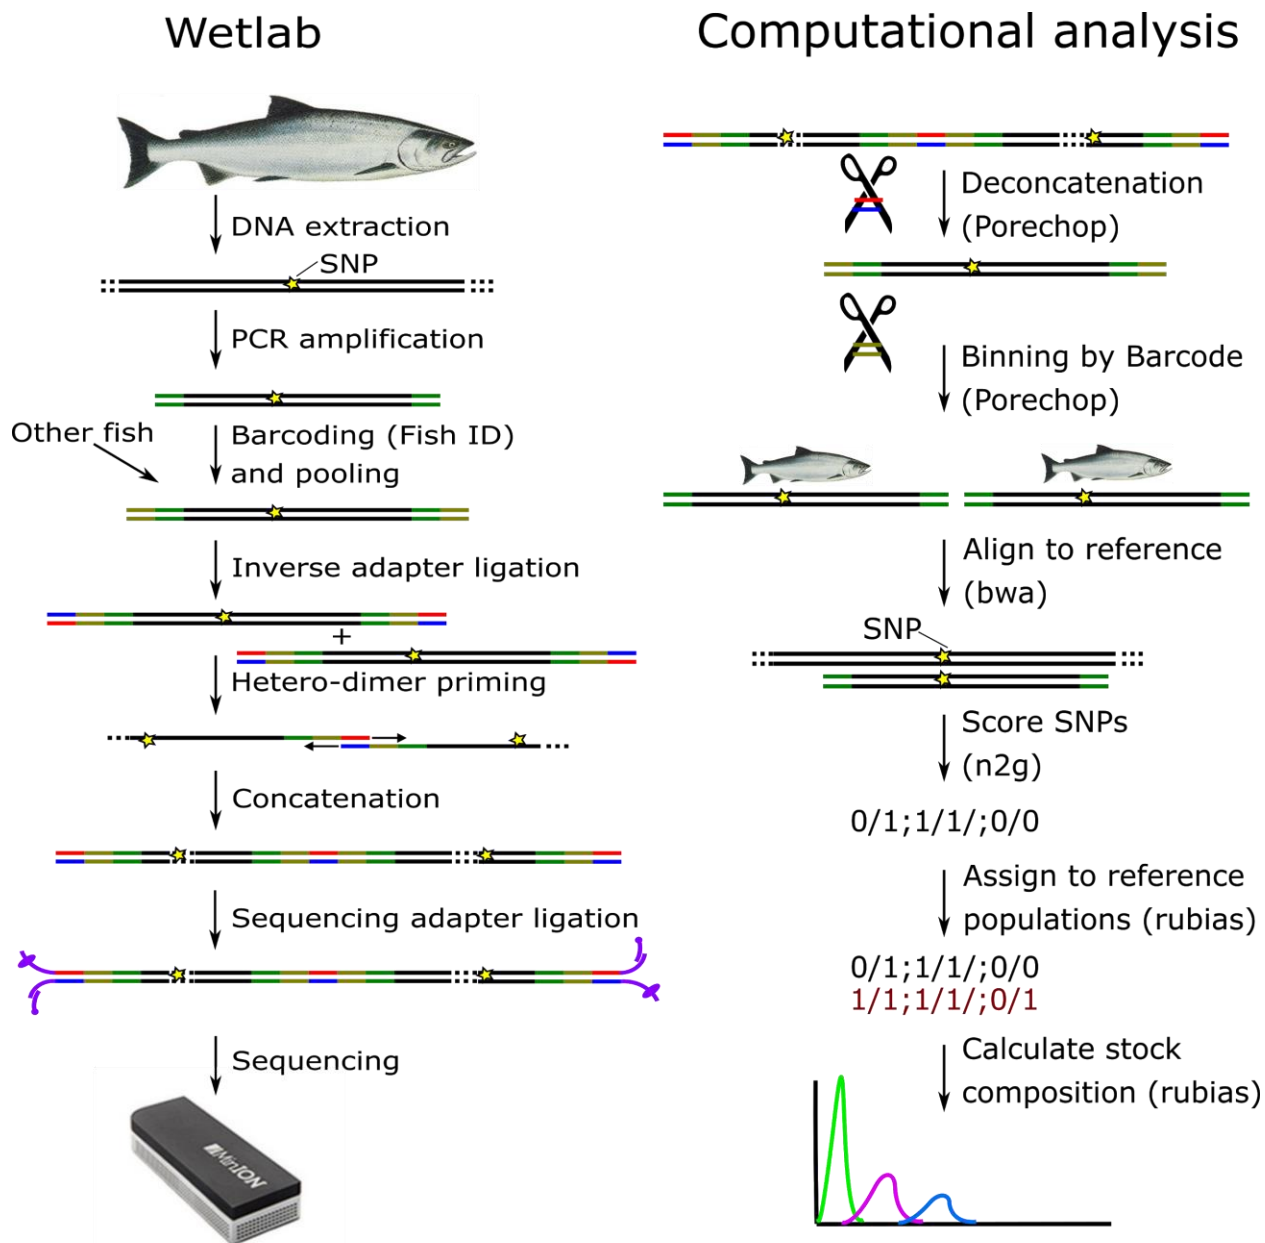

156

157 *Figure 3: Simplified wet-lab workflow for DNA extraction, amplification, barcoding, and concatenation before sequencing and*  
 158 *pipeline of the following computational analysis. DNA is shown in black, amplification primers in green, fish ID barcodes in*  
 159 *olive, concatenation adapters in red/blue, and sequencing adapters in purple.*  
 160

## 161 Nanopore sequencing

162 After flow cell priming and loading of the library, the flow cell was placed on the minION sequencer.  
163 Sequencing and basecalling into fast5 and fastq was performed simultaneously using minKNOW (version 3.1.8)  
164 on an Ubuntu 14.06 platform.

## 165 Deconcatenation and binning

166 First, all fastq raw reads that passed default quality control in minKNOW were combined into bins of  
167 500k reads each. This had empirically been determined to be the maximum number of reads allowing  
168 simultaneous processing in the downstream analysis on our platform (Ubuntu 14.06, 31.2 GiB RAM 7700K CPU  
169 @ 4.20GHz × 8). Reads containing concatenated amplicons were deconcatenated and the concatenation  
170 adapter sequence was trimmed off the remaining sequence using porechop  
171 (<https://github.com/rrwick/Porechop>) with a custom adapter file (“adapters.py”) that only contained the  
172 concatenation adapter under the following settings:

```
173 porechop-runner.py -i input_raw_reads.fastq -o output/dir -t 16 --middle_threshold 75 --min_split_read_size  
174 100 --extra_middle_trim_bad_side 0 --extra_middle_trim_good_side 0
```

175 We binned the deconcatenated reads by barcode corresponding to fish individuals by using porechop with the  
176 provided default adapters file and the following settings:

```
177 porechop-runner.py -i input_deconcatenated_reads.fastq -b binning/dir -t 16 --adapter_threshold 90 --  
178 end_threshold 75 --check_reads 100000
```

179 After this step, all reads from the corresponding barcode bins corresponding to the same individual across the  
180 different 500k sub-bins were combined for downstream analysis. See  
181 <https://github.com/bensutherland/nano2geno/> for source scripts for analysis.

## 182 Alignment and SNP calling

183 We aligned the binned reads to the reference amplicon sequences using BWA-MEM and indexed using  
184 samtools (Li et al. 2009; Li and Durbin 2009). Alignment statistics for all loci were generated using pysamstats  
185 (<https://github.com/alimanfoo/pysamstats>; flags: -t variation -f) and we extracted the nucleotides observed  
186 at the relevant SNP hotspot loci from the resulting file using a custom R script by looping through the results  
187 file guided by a SNP location file. Finally, we compared the observed nucleotide distributions at SNP hotspots  
188 with to the hotspot reference and variant nucleotides and scored as homozygous reference when ≥66% of the  
189 nucleotides were the reference allele, heterozygous when the reference allele was present <66% and the  
190 variant allele > 33%, or as homozygous variant (when the nucleotides were ≥66% the variant allele) using a  
191 custom R script to generate a numerical locus table. We visually inspected alignments determined to be  
192 problematic using the IGV viewer (Robinson et al. 2011). The full pipeline titled “nano2geno” (n2g) including  
193 all custom scripts can be found at <https://github.com/bensutherland/nano2geno/> (Figure 3).

## 194 Mixed-stock Analysis

195 We performed mixture compositions and individual assignments using the R package rubias (Moran  
196 and Anderson 2019) with default parameters against the coho coastwide baseline of known allele frequencies  
197 for these markers established by Beacham et al.

## 200 Ion torrent sequencing

201 To confirm the results obtained by Nanopore sequencing, the tissue samples were sequenced using an  
202 Ion Torrent sequencer according to Beacham et al. 2017 (Beacham et al. 2017) . In brief: DNA was extracted  
203 from the frozen tissue samples using Biosprint 96 SRC Tissue extraction kit, and multiplex PCR and barcoding  
204 with Ion Torrent Ion Codes was performed using the AgriSeq HTS Library Kit (ThermoFisher). The libraries  
205 were then prepared with the Ion Chef for sequencing on the Ion Torrent Proton Sequencer and SNP variants  
206 were either called by the Proton VariantCaller (ThermoFisher; Torrent Suite 5.14.0) software or the custom  
207 SNP calling script of the nano2geno pipeline. The resulting locus score table was then analyzed using rubias as  
208 described above.

209

210

211

## 212 Concordance assessment

213 We assessed concordance between sequencing platforms on SNP level. A PCoA analysis was performed  
214 using the R package ape based on a reference vs allele call matrix (Paradis and Schliep 2019). Additionally,  
215 calls (reference vs. alternate allele) were compared for each sample and marker individually, then averaged  
216 by individual, and then averaged by the entire assessed population. Similarly, we compared stock assignment  
217 by rubias by comparing the reporting unit or collection as assigned and scoring a match (1) or non-match (0).  
218 These scores were then averaged again to generate the final concordance or repeatability score as a percentage.

219

## 220 Results

221

### 222 In-field Nanopore Sequencing:

223 During the International Year of the Salmon Signature expedition to the Gulf of Alaska in February and  
224 March 2019, in-field single nucleotide polymorphism genetic stock identification (SNP GSI) was performed on  
225 coho salmon as the tissues became available. A total of 75 coho salmon were analyzed in two sequencing runs  
226 at different points during the expedition, representing 77% of all coho salmon captured during the expedition.  
227 The first sequencing run was performed on February 26<sup>th</sup> and included 31 individuals. Library preparation  
228 onboard the vessel took 14h. However, faulty flow cell priming resulted in only approximately half the detected  
229 pores being active (843 pores) in this first attempt. Of these pores, no more than 25% were actively sequencing  
230 at any time, highlighting the challenges of utilizing sensitive equipment under field conditions including  
231 excessive ship movement. Accordingly, sequencing for 30h and base-calling for 34h resulted in only 1.44M  
232 reads, 49% of which passed quality control. The read length distribution showed several large concatenated  
233 amplicons up to 7,095 bp with a mean length of 825 bp (Figure 4). Deconcatenation resulted in a read inflation  
234 by a factor of 2x (702k to 1,444k reads). After binning, reads per individual ranged from 1,983 to 86,467 reads  
235 with a mean of 13,709 reads (SD: 15,370), and 722,174 reads that were not able to be assigned (50% of total  
236 deconcatenated reads) (Figure 4, Figure 5, Figure 6).

237 The second sequencing run was performed on March 10<sup>th</sup> 2019 with 44 coho salmon. Library  
238 preparation again took 14h and sequencing on a new flow cell took 15h, starting with 1,502 available pores,  
239 and up to 65% actively sequencing pores, and resulted in 4.48M reads, 76% of which passed quality control.  
240 Read lengths averaged 810 bp with a maximum length of 8,023 bp (Figure 4). Due to the large number of reads  
241 and the limited power of the computer being used for the analysis, base-calling into fastq took three days.  
242 Deconcatenation resulted in a read inflation of a factor of 1.7x (3.4M to 5.8M) (Figure 4). Reads per individual  
243 showed a mean of 67,636 reads (SD: 59,393; min: 11,684; max: 335,348), with 722,179 reads remaining  
244 unassigned (12%) (Figure 4, Figure 5, Figure 6).

245 Upon return from the expedition, we sequenced 80 individuals, including all those previously  
246 genotyped aboard the vessel, in a single MinION run using the expedition setup starting from the frozen tissues  
247 from the expedition. We sequenced for 42h to maximize the total number of reads with 60% of 2,048 available  
248 pores actively sequencing resulting in 5.32 M reads. Of these reads, 3.20 M passed quality control. Again, large  
249 concatenated amplicons up to 9,449 kb were observed, with a mean read length of 840 bp, and deconcatenation  
250 resulted in 4.54 M reads (1.4x inflation) (Figure 4). The mean number of reads per bin was 29,439 (SD: 25,000)  
251 and ranged from 2,969 to 128,718 reads per individual, with 1,413,626 unassigned reads (31%) (Figures 4-6).

252 Despite the absence of normalization between samples prior to multiplex PCR, barcoding, and loading,  
253 the binning distribution across samples was relatively even with only a few apparent outliers observed (Figure  
254 5, Figure 6). The minimum number of reads per individual sample necessary to cover sufficient loci (at a  
255 minimum depth of 10 sequences per locus) for downstream stock assignments (i.e., at least 141 loci per  
256 sample) is around 2,000 reads (Figure 5, Figure 6).

257

258

259

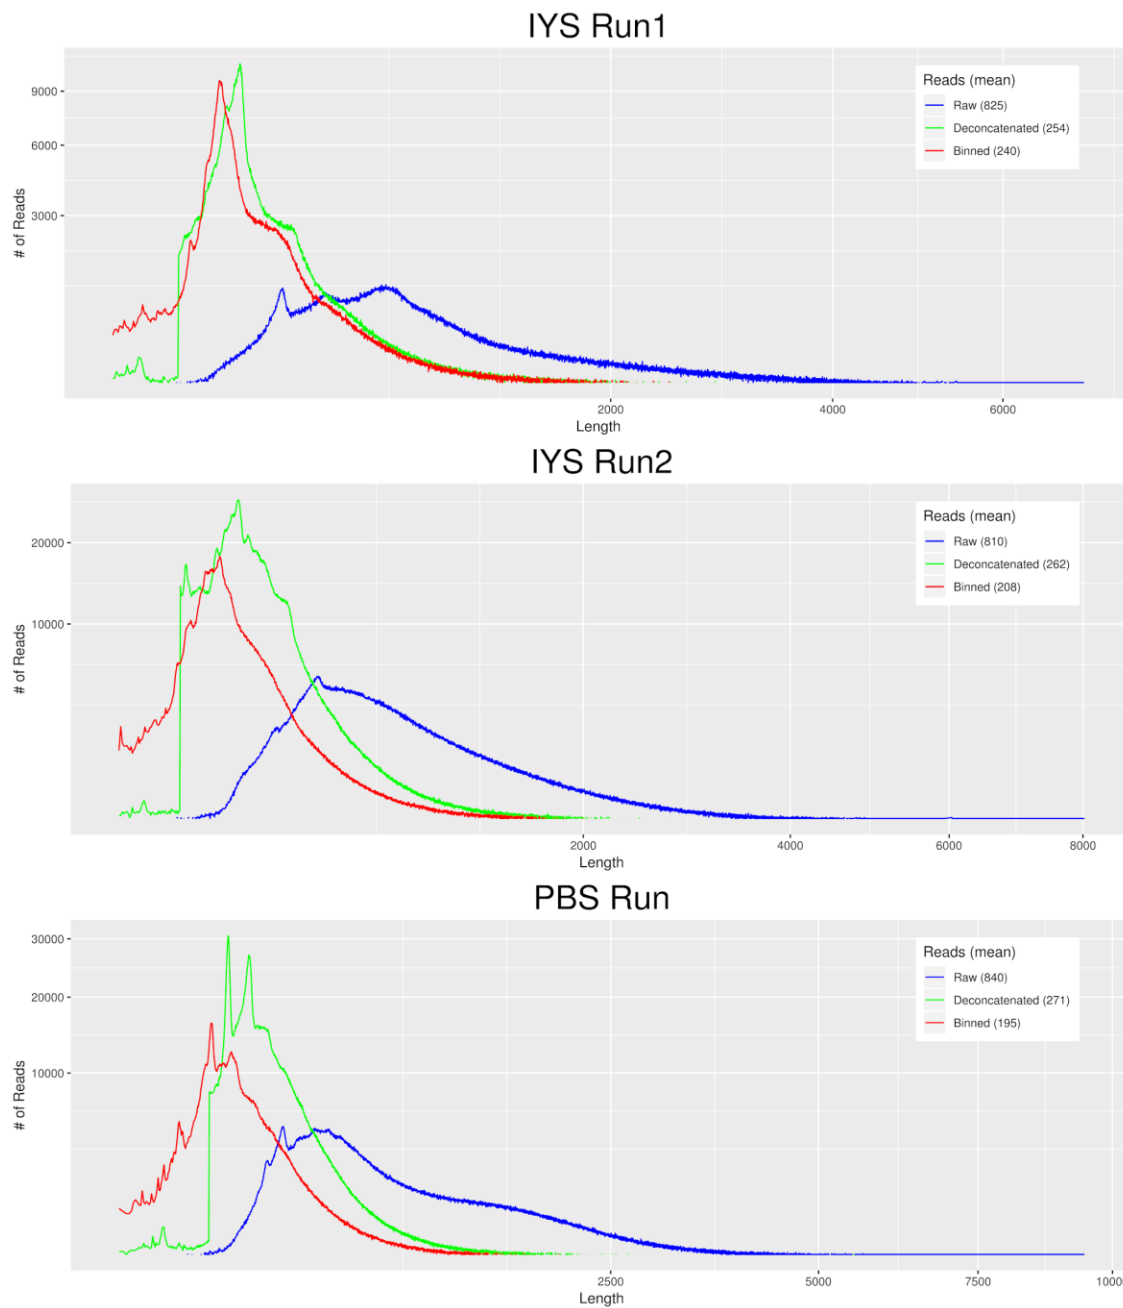

260

261 *Figure 4: Read length distribution of sequences by Nanopore run: Raw concatenated Nanopore reads shown in red,*  
262 *deconcatenated reads in blue and binned reads in green with the mean read length shown in the legend in parentheses. IYS*  
263 *Run 1 and IYS Run 2 were performed at-sea onboard the *Professor Kaganovsky*, the control run upon return from the*  
264 *expedition is titled "PBS Run" . All axes are square-root transformed.*

265



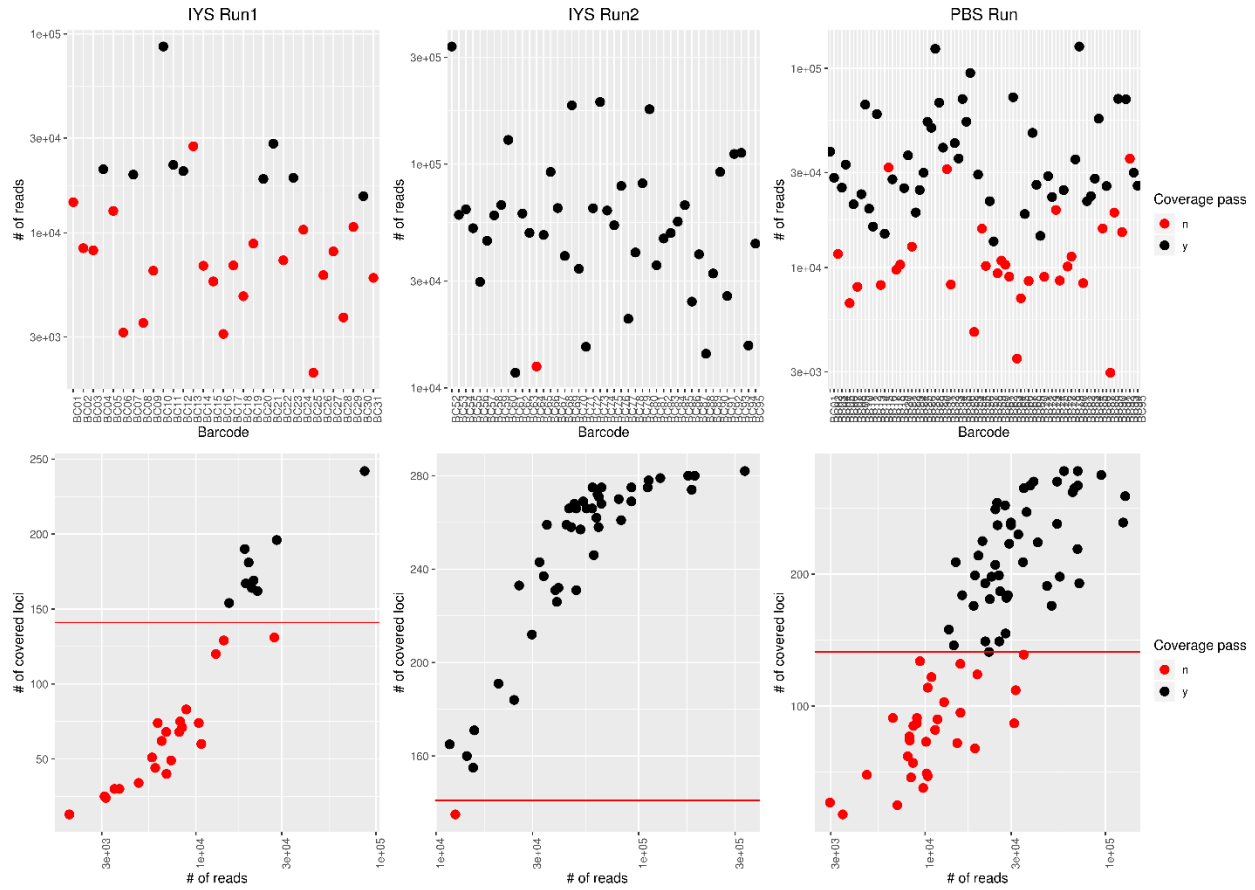

266

267 *Figure 5: Nanopore sequencing statistics. The top row shows the number of reads binned by individual (barcode). The bottom*  
268 *row shows the number of loci with sufficient read depth ( $\geq 10$  reads) by the number of reads for each sample. The threshold for*  
269 *downstream analysis was set to 141 loci (50% of loci for this panel) and is indicated in the red line in the second row. Individuals*  
270 *(barcode bins) are coloured according to whether they passed this coverage threshold (black) or not (red).*

271

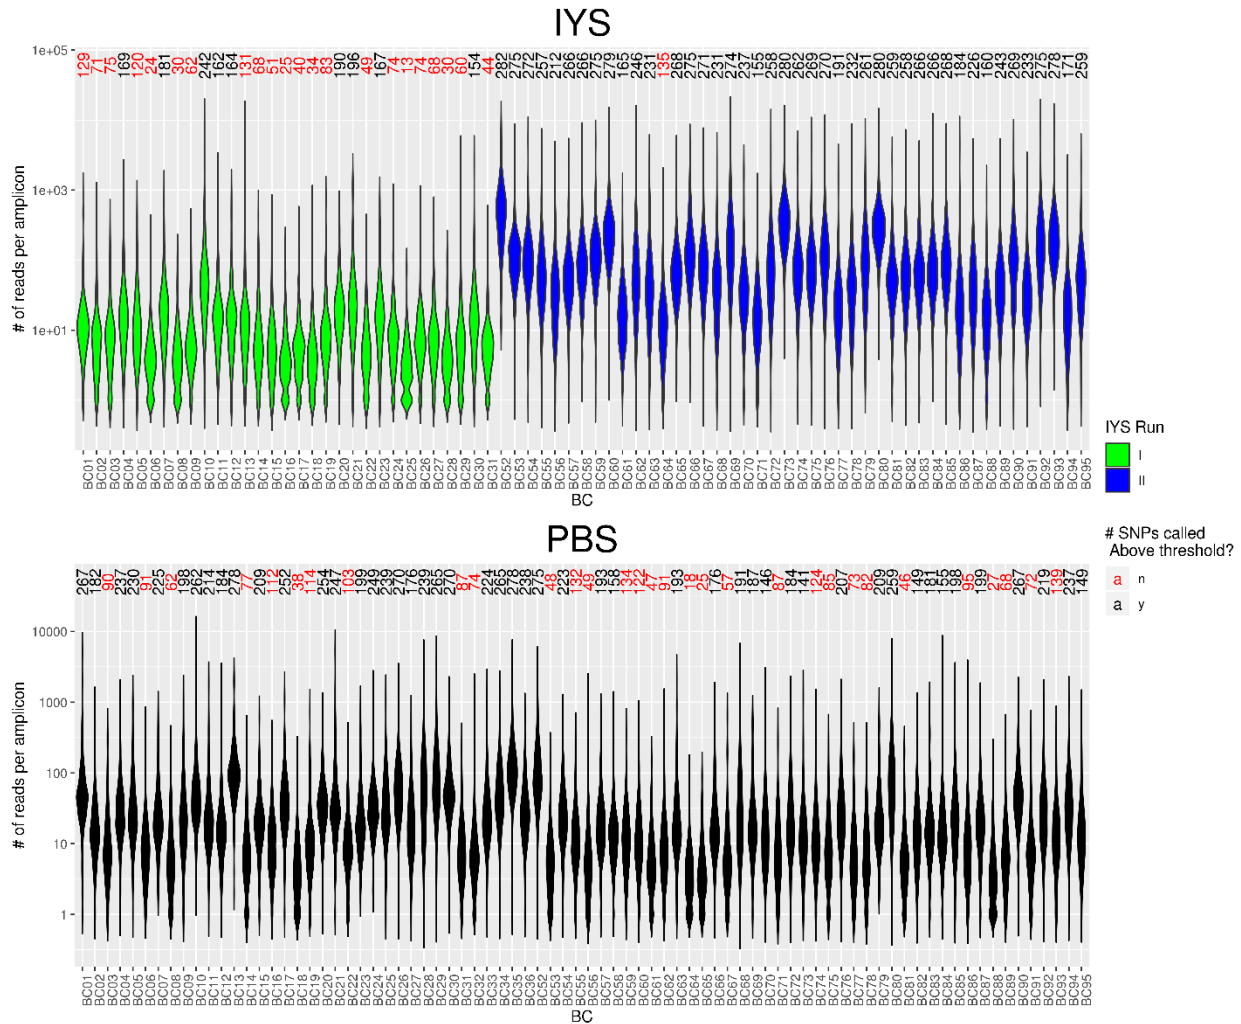

272  
273 *Figure 6: Number of reads per amplicon per individual (barcode) of Nanopore sequencing runs. The violin plot shows the*  
274 *distribution of number of reads assigned to unique SNP-containing amplicons within an individual. Green and blue colors*  
275 *denote the two separate sequencing runs during the IYS expedition (top), and black indicates the run at the laboratory*  
276 *(PBS; bottom). Above each individual violin plot is the total number of amplicons for that individual for which sufficient reads*  
277 *were present to call the genotype, color indicates if enough amplicons were called for downstream analysis (black) or not (red).*  
278 *The order of individuals is matched in the top and bottom plots.*

279  
280 **Nanopore sequencing data requires loci reassessment for efficient SNP calling**

281 After alignment to the reference sequences for SNP calling, Nanopore sequence data showed a  
282 comparatively higher error rate than Ion Torrent reads, as expected, with abundant indels that frequently led  
283 to lower alignment scores than those obtained by the Ion Torrent data (Ion Torrent average alignment score:  
284 25.6 MAPQ; Nanopore average alignment score: 13.9 MAPQ). Specifically, regions containing homopolymer  
285 tracts were poorly resolved, as had previously been reported (Cornelis et al. 2017). Several instances could be  
286 identified where the homopolymer presence near the SNP locus caused problematic alignments and therefore  
287 resulted in SNP calls not matching those found by the Ion Torrent on the same individual (Figure 7).  
288 Accordingly, six such loci were excluded from downstream analysis (Supp. Table 1). Other loci were excluded  
289 from the analysis due to absence of coverage (four loci) or the inability of the custom n2g pipeline to call MNPs  
290 (multi-nucleotide polymorphisms) or deletions (seven loci), bringing the number of accessed loci from 299 to  
291 282 loci. Other loci showing apparent differences between Nanopore and Ion Torrent sequence data (n = 21)  
292 were retained as no apparent explanation for the discrepancies could be identified.

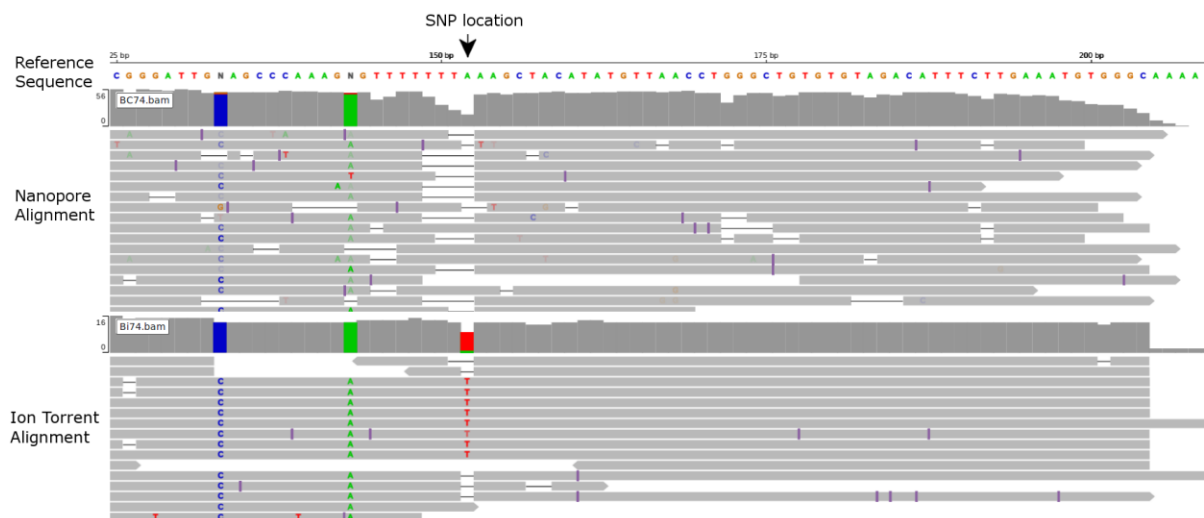

293  
294 *Figure 7: Comparison of sequence alignment of Nanopore and Ion Torrent sequences from the same individual against a SNP*  
295 *locus preceded by a homopolymer tract. Nanopore sequences show a higher number of indels, specifically associated with*  
296 *the poly-T homopolymer tract (145-151bp) directly preceding the SNP location (152bp). Alignment was visualized here*  
297 *using IGV (Robinson et al. 2011)*

298 After the removal of the discrepancies due to MNP, homopolymer, or deletion presence, the SNP cutoff  
299 for downstream analysis was set to 141 loci (50%). Only nine of 31 individuals (29%) of the first IYS sequencing  
300 run with problematic flow cell priming passed this threshold. In the second IYS sequencing run, 43 of 44  
301 individuals passed the threshold (98%). The repeat run performed at the Pacific Biological Station resulted in  
302 50 of the 80 (63%) that passed this threshold (Figure 6).  
303

### 304 Platform biases lead to moderately altered SNP calling compared to Ion Torrent 305 sequencing

306 To assess the discrepancies between sequencing platforms, individuals that passed the genotyping  
307 rate threshold of 141 called loci (50% genotyping rate) in all data sets (i.e., Nanopore data during the expedition  
308 analyzed with n2g: “nano IYS”, Nanopore acquired during the repeat run upon return from the expedition,  
309 analyzed with n2g: “nano PBS”, Ion Torrent sequencing data analyzed with variant caller: “ion vc”, Ion Torrent  
310 analyzed with n2g: “ion n2g”) were included in a PCoA analysis on the SNP genotypes (Figure 8). This  
311 comparison excluded the MNP, deletion, and homopolymer loci (see above), but retained those without an  
312 explanation as to why the genotyping did not match. However, there was still an apparent separation by  
313 sequencing platform across the highest-scoring dimension (Figure 8). This trend was reflected by 83.9% of SNP  
314 calls generated by Nanopore sequencing during the IYS expedition (nano IYS) and 83.7% of SNP calls generated  
315 during the repeat run upon return (nano PBS) matching the SNP calls based on Ion Torrent data (ion n2g). The  
316 agreement on SNP call between both Nanopore runs (comparing reference or alternate scores for both alleles  
317 from nano IYS vs nano PBS) was 84.4%, highlighting the inter run variability associated with current Nanopore  
318 sequencing. There was a slight correlation observed between the number of Nanopore reads per individual and  
319 the concordance with Ion Torrent SNP calls, suggesting that read depth is only a minor factor influencing SNP  
320 call concordance at the current threshold of a minimal alignment depth of 10x per site for Nanopore reads  
321 (Figure 9). Excluding MNPs, deletions, and homopolymer issues, the influence of the SNP calling pipeline (n2g  
322 vs. variant caller) appears negligible compared to the differences by sequencing platform (Figure 8).  
323 Accordingly, SNPs scored based on the same Ion Torrent data sequence matched in 99.21% of cases between  
324 the two genotyping pipelines.  
325  
326

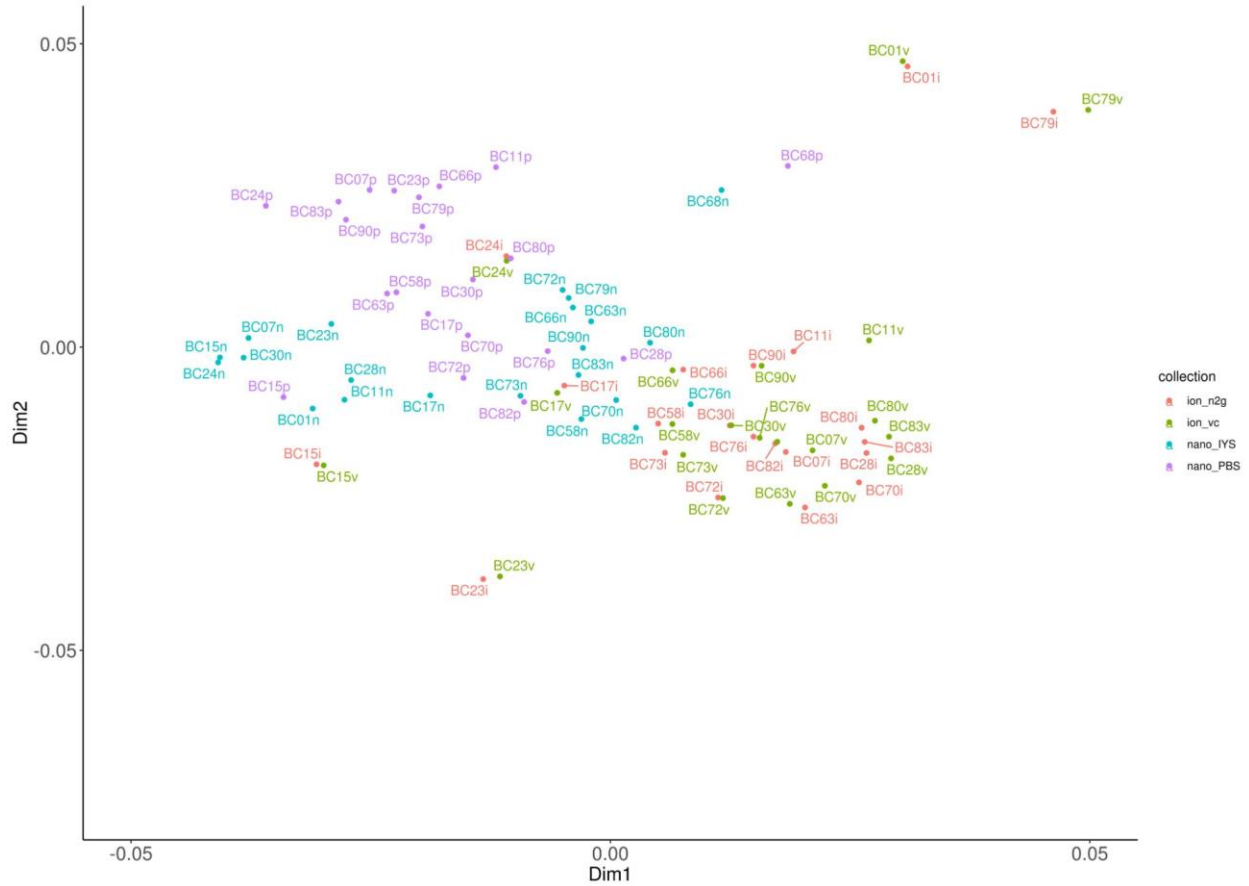

327

328 *Figure 8: Principal coordinate analysis (PCoA) of SNP calls of individuals passing threshold in all datasets. SNP calls based on*  
329 *Nanopore sequences generated during the IYS expedition shown in blue ("nano\_IYS"), and the same individuals reanalyzed*  
330 *upon return using the same workflow shown in purple ("nano\_PBS"). Ion Torrent reads scored with the n2g pipeline are*  
331 *shown in red ("ion\_n2g") and scores derived from the Ion Torrent variant caller are shown in green ("ion\_vc").*

332

333

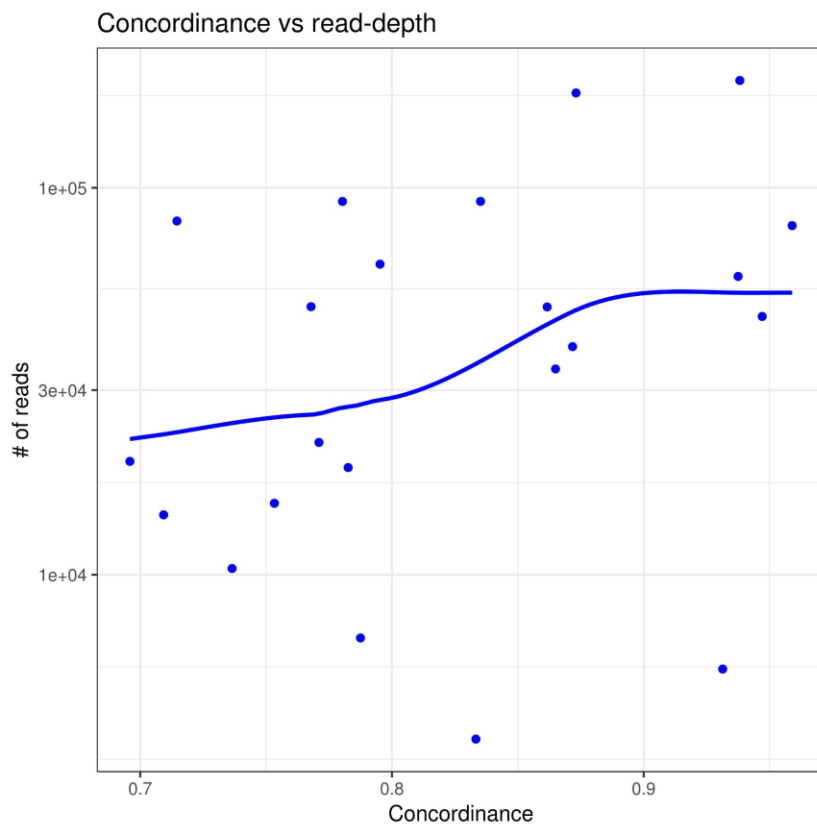

334

335 *Figure 9: SNP call concordance between sequencing platforms shows weak correlation with Nanopore read counts.*  
336 Concordance of Nanopore read based SNP calls with SNP calls generated from Ion Torrent based sequencing are plotted  
337 against read number in the associated barcode bin. Linear regression of the data by loess is depicted in lines corresponding  
338 in color with the samples.

### 339 Stock assignment based on Nanopore data differs inherently from Ion Torrent based 340 assignments in a subset of individuals

341 Stock assignment by rubias showed discrepancies between the Nanopore and Ion Torrent based  
342 datasets. In only 61.5% of cases did Nanopore sequences (PBS run) lead to the same top reporting unit (repunit;  
343 large scale geographic areas such as Westcoast Vancouver Island or Lower Fraser River) assignment for  
344 individual stock ID as the Ion Torrent based sequences (Figure 10, Table 1). Specifically, Nanopore-based  
345 repunit assignment showed higher proportions of assignments to South Eastern Alaska (SEAK) than Ion  
346 Torrent-based assignments (Figure 10, Table 1).

347 Nevertheless, mixture proportions in both datasets were dominated by South Eastern Alaska stocks. Nanopore  
348 assignments tended to overestimate the contribution to this stock as well as Lower Stikine River stocks (LSTK).  
349 Many of the individuals assigned to these stocks using the Nanopore were assigned to the adjacent stocks of  
350 Lower Hecate Strait and Haro Strait (HecLow+HStr) as well as Southern Coastal Streams, Queen Charlotte  
351 Strait, Johnston Strait and Southern Fjords (SC + SFj) on the Ion Torrent platform (Figure 10, Table 1).  
352 Individuals from stocks well represented in the database like the Columbia River were confidently assigned to  
353 the appropriate stock on both platforms.

354

355 Table1: Relative proportion of top reporting units (contribution >3%) to the overall mixture of coho salmon.  
 356 Only individuals that had successful stock ID on all three GSI runs are included. Reporting Units: SEAK:  
 357 Southeast Alaska; LSTK: Lower Stikine River; NCS: North Coast Streams (BC); HecLow+HStr: Lower Hecate  
 358 Strait and Haro Strait; SC + SFj: Southern Coastal Streams, Queen Charlotte Strait, Johnston Strait and Southern  
 359 Fjords; CR: Columbia River; COWA: Coastal Washington; LNASS: Lower Nass River; WVI: West Vancouver  
 360 Island; OR: Oregon.  
 361

|      | Ion Torrent (ion_vc) |            |          | Nanopore (nano_PBS) |          |          |
|------|----------------------|------------|----------|---------------------|----------|----------|
| Rank | Repunit              | Proportion | SD       | Repunit             | repprop  | SD       |
| 1    | SEAK                 | 0.437678   | 0.109758 | SEAK                | 0.662083 | 0.218561 |
| 2    | HecLow+HStr          | 0.178637   | 0.057264 | LSTK                | 0.205116 | NA       |
| 3    | LSTK                 | 0.068878   | NA       | CR                  | 0.050276 | 0.012993 |
| 4    | SC+SFj               | 0.067989   | 0.025318 | COWA                | 0.042244 | 0.011583 |
| 5    | CR                   | 0.067939   | 0.01403  |                     |          |          |
| 6    | NCS                  | 0.036009   | 0.004052 |                     |          |          |
| 7    | OR                   | 0.034352   | 0.010704 |                     |          |          |
| 8    | WVI                  | 0.033487   | 0.009144 |                     |          |          |
| 9    | LNASS                | 0.032288   | 0.022742 |                     |          |          |

362

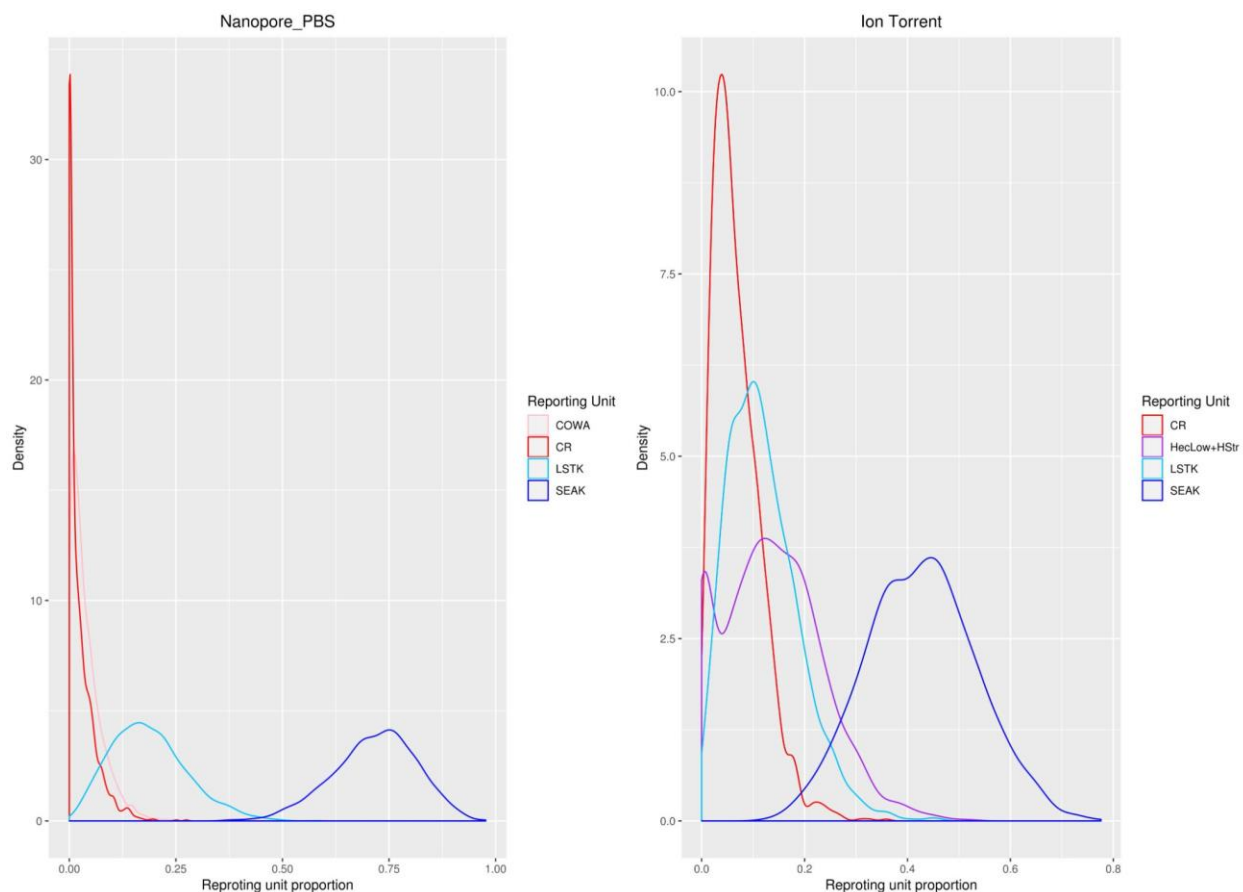

363  
364

365 *Figure 10: Relative proportion of reporting units to the overall mixture of coho salmon. Only individuals that had passed the*  
366 *stock ID threshold (>50% of SNPs called) on all three GSI runs are included. Reporting Units: SEAK: Southeast Alaska; LSTK:*  
367 *Lower Stikine River; HecLow+HStr: Lower Hecate Strait and Haro Strait; SC + SFj: Southern Coastal Streams, Queen*  
368 *Charlotte Strait, Johnston Strait and Southern Fjords; CR: Columbia River; COWA: Coastal Washington.*

369 However, Z-scores calculated by rubias during stock assignment, which are an indirect measure of how  
370 well the SNP call match individuals in the baseline dataset of both, indicated that the Nanopore and the Ion  
371 Torrent data showed large deviations from the normal distribution, suggesting that many individuals assayed  
372 are not well represented in the database (Figure 11) (Moran and Anderson 2019). Ion Torrent data shows two  
373 peaks, one overlaying the expected normal distribution and a second peak that lay outside of the normal  
374 distribution. This suggests that about half of the individuals were not from populations that are well  
375 represented in the database (Figure 11). Similarly, Nanopore-based assignments showed even more aberrant  
376 distribution, presumably due to the additive effects of the sequencing platform introducing bias on top of poor  
377 baseline representation (Figure 11). The poor database representation could cause small differences in SNP  
378 calls to cause alternative assignments.

379

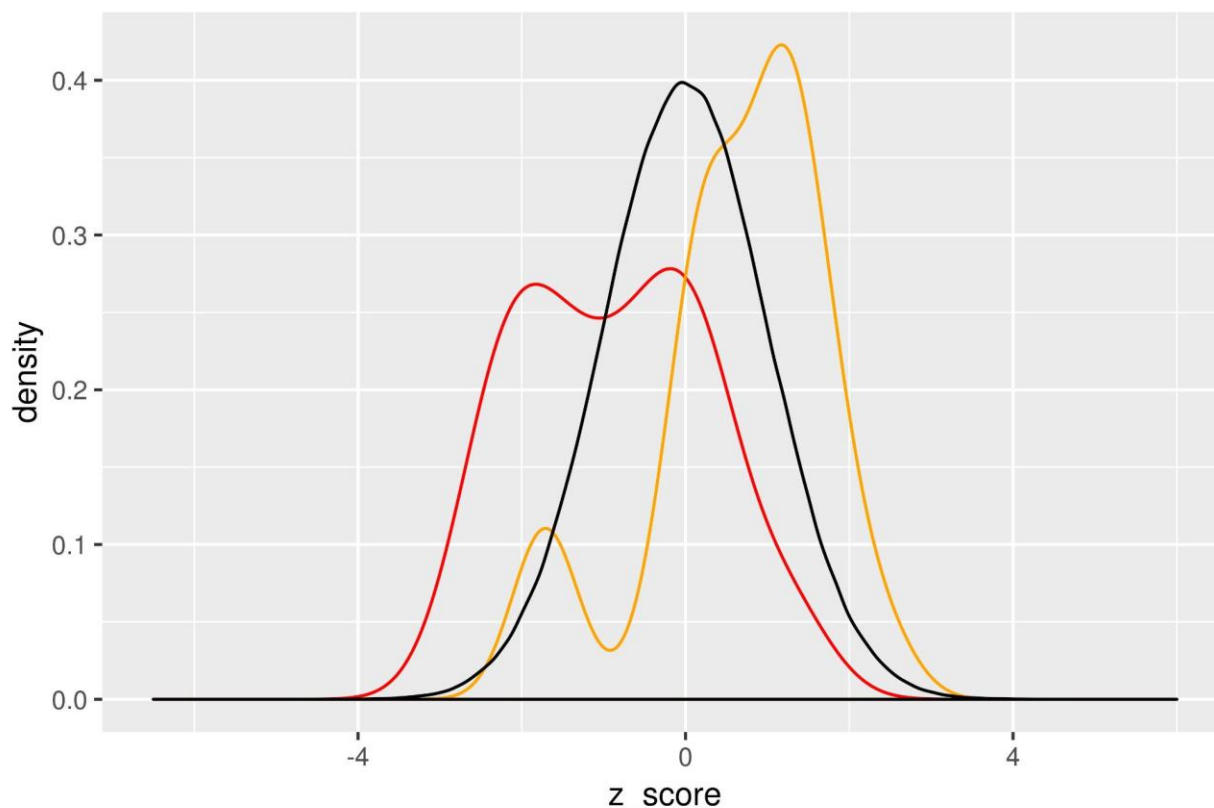

380  
381 *Figure 11: Z-score distribution of reference assignment by sequencing run: Black: Normal distribution, Red: Ion Torrent data,*  
382 *Yellow: PBS Nanopore data. A perfect representation of the assessed individuals would overlap the normal distribution.*

383

## 384 Discussion

385

### 386 Nanopore sequencing enables remote in-field single nucleotide polymorphism 387 genetic stock identification

388 Here, we present the first proof-of-concept study demonstrating the feasibility of using the portable  
389 Oxford Nanopore minION sequencer for remote in-field genetic stock identification by SNP sequencing of  
390 Pacific salmon. We developed a rapid sample processing workflow that relied on amplicon concatenation to  
391 increase throughput. With this workflow, we performed genetic stock identification on 75 coho salmon  
392 onboard a research vessel in the Gulf of Alaska, with minimal equipment during two runs. Genetic stock  
393 identification of all 80 captured coho salmon in a single run using the mobile platform resulted in stock  
394 assignment for 50 individuals at 67% concordance with state of the art laboratory based pipelines.

395 Despite its promising performance, the fidelity, throughput, and turnaround time of Nanopore-based  
396 SNP GSI currently still falls short of what would enable this technology to be used for the wide range of remote  
397 real-time applications we intended it for. This is due to a number of factors, such as inefficient barcoding, error  
398 rates, inefficiencies of custom genotyping pipelines, low concatenation efficiency, and limited computational  
399 power in our setup.

400 The inherent low fidelity of the Nanopore platform using R9 type flow cells relative to other sequencing  
401 technologies, specifically around homopolymer tracts, proved to be the major shortcoming, limiting both the  
402 actual SNP calling accuracy, causing comparatively low repeatability, as well as the throughput, by  
403 necessitating a higher alignment coverage due to the high error rate (Cornelis et al. 2017). The low fidelity of  
404 the Nanopore sequences was specifically apparent when comparing it with the established sequencing



405 platform for genetic stock identification by SNP sequencing, the Ion Torrent Proton sequencer (Beacham et al.  
406 2017). The Ion Torrent short read sequencer routinely outperformed the Nanopore sequencer, both in  
407 accuracy and in throughput. The latter being a major restricting factor of the Nanopore platform due to a limited  
408 number of available sequencing pores inherent to the platform. While we compensated for this limitation by  
409 concatenating amplicons, to generate several amplicon sequences per Nanopore read, the efficiency of this  
410 approach was modest, yielding only a two-fold increase in throughput at present. Further, the needs for  
411 concatenation and higher inputs required several PCR amplification steps that could have contributed to the  
412 observed shifts in allele frequencies leading to differing assignments on the different platforms. Turnaround  
413 time in the present study was mostly restricted by the computational capacity of the portable laptop used for  
414 the computational analysis. Specifically, base calling by translating the raw electrical signal recorded by the  
415 minION sequencer into fastq nucleotide reads proved to be the most time-consuming step, requiring up to  
416 several days in computing time.

417 However, despite the limitations associated with the Nanopore platform described above, the stock  
418 composition of coho in the Gulf of Alaska also confounded accuracy and fidelity of stock assignment. Most  
419 importantly, the majority of fish sampled and assessed during the Gulf of Alaska expedition were assigned to  
420 Southeastern Alaska and adjacent British Columbia coast stocks (SEAK, HecLow+HStr, SC + SFj). These stocks  
421 are poorly represented in the queried baseline and stocks from northern Alaska are very sparse so that fish  
422 from such origin often get assigned to the SEAK with poor confidence. This meant that even on the Ion Torrent  
423 platform, assignment probabilities were low, causing small differences in SNP content between the two  
424 platforms to lead to alternating assignment between these stocks (i.e. SEAK assignment on Nanopore being  
425 assigned to HecLow+HStr and SC + SFj on Ion Torrent). Indeed, stock assignment on the Ion Torrent platform  
426 using an updated and expanded baseline and primer set, resulted in high confidence assignment of many of  
427 these individuals to Kynoch and Mussel Inlets, a spatially close reporting unit on the Northern BC coast that  
428 was poorly represented in the original baseline (C. Neville, personal communication). This suggests that new  
429 loci included in the updated primer set and baseline were able to resolve these stocks at higher confidence and  
430 assign them to the appropriate stock (Beacham et al. 2020). Fortunately, all of the current limitations  
431 mentioned above will be addressed in further development and we expect significant improvements in all  
432 fields, ultimately delivering a high throughput, real-time, in-field sequencing platform.  
433

## 434 Advances to the Nanopore platform, sample preparation, as well as computational 435 infrastructure will improve turnaround, throughput, and fidelity

436 While we were successful in providing a proof-of-principle study demonstrating that the Nanopore  
437 platform is capable of in-field genotyping, the throughput, fidelity, and turnaround, remained below the level  
438 needed to put this platform into standard operation for GSI by SNP genotyping. Several modifications in the  
439 workflow are planned to improve the throughput. Currently, barcoding relies on inefficient blunt-end ligation  
440 of the barcoding adapters to the PCR amplicons, leading to up to 50% unbarcoded amplicons and therefore  
441 wasting a large portion of sequencing capacity. Including the ligation adapter sequences needed to add the  
442 barcodes in the PCR primers will improve the efficacy of barcoding by circumventing the inefficient and  
443 laborious blunt-end ligation. This will improve sequencing throughput, while at the same time speeding up the  
444 sample preparation by approximately one hour. Next, concatenation efficiency is currently relatively low,  
445 increasing throughput only two-fold. While large concatemers approaching 10kb were observed, they were  
446 relatively rare. Optimized concatenation conditions by adjusting the reaction conditions such as annealing  
447 temperature and duration should exponentially improve throughput by both increasing the relative abundance  
448 of concatenated amplicons, as well as the total length of concatemers. Further workflow improvements could  
449 include pre-aliquoting of DNA extraction solution, barcodes and primers, as well as bead cleaning materials in  
450 96 well plates before heading into the field, which should reduce an additional two hours of sample  
451 preparation, as well as reduce the risk of cross-contamination in the field. Together, these improvements  
452 should bring the total sample preparation time to about 10h, with approximately half the time being hands-on.

453 The major current bottleneck in turnaround time is the time that base calling takes on the portable  
454 laptop computer used in the present study. The Nanopore computation unit minIT, however, can provide real-  
455 time base calling to fastq and is currently being tested in the follow-up work to the present study. Actual real-  
456 time basecalling will bring the workflow in the neighbourhood of the desired 24h turnaround time.

457 An additional issue for using Nanopore sequencing is the low accuracy of the sequencing platform at  
458 the time of this project using the R9 flow cells. This low accuracy requires excessively high alignment coverage

459 at SNP locations to ensure accurate SNP calling. However, newer Nanopore flow cells promise greatly increased  
460 accuracy (e.g., 99.999% for R10) due to “a longer barrel and dual reader head” and have recently become  
461 available. This updated flow cell technology is therefore expected to greatly improve sequencing accuracy and  
462 possibly allow the lowering of alignment thresholds for SNP calling, thereby increasing the throughput more  
463 than twofold. Improvements to the SNP calling pipeline, might enable the identification and exclusion of  
464 erroneous SNP calls due to the ability to calculate the p-error associated with SNP calls, thereby increasing  
465 accuracy and repeatability. Finally, in selecting SNP loci for inclusion in GSI baselines, consideration of the types  
466 of sequences that are most problematic for Nanopore sequencing (e.g. homopolymer tracts) could go a long  
467 way to improving performance across platforms. Testing power in coastwide baselines once these problematic  
468 loci are excluded will be an important future step. Extrapolating the above mentioned improvements would  
469 improve the current throughput of 96 individuals per flow cell by more than an order of magnitude, thereby  
470 enabling cost-effective real-time and/or field-based application of the platform.

471 Currently, Nanopore-based SNP GSI is an experimental in-field stock identification tool. Turnaround  
472 of several days and throughput limited to only 96 individuals per flow cell limit its attractiveness for a wider  
473 user base. Future improvements of the sequencing platform, the sample preparation procedure as well as the  
474 computational infrastructure will greatly improve throughput and turnaround for this. This should enable the  
475 application of Nanopore-based SNP GSI for near-real-time stock management of variable batch sizes at-sea or  
476 in remote locations. Further, parallel sequencing on several flow cells using the Oxford Nanopore GridION,  
477 which can employ five flow cells simultaneously, would enable dynamic real-time stock identification using  
478 variable batch sizes from dozens to hundreds of individuals. In the event that rapid turnaround is required, the  
479 sequencing library can also be spread across several flow cells on the GridION. Together, these updates would  
480 greatly improve the abilities of multiple user groups including government, Indigenous communities, and  
481 conservation organizations to conduct GSI for safeguarding populations at risk, while allowing sustainable  
482 harvest of healthy populations.

483

## 484 Acknowledgements

485 The authors would like to thank the following individuals for their contribution to the expedition and  
486 to the manuscript: Richard Beamish, Brian Riddell, and the NPAFC secretariat for the organization of the 2019  
487 Gulf of Alaska expedition. The entire scientific crew of the 2019 GoA expedition: Evgeny Pakhomov, Gerard  
488 Foley, Brian P.V. Hunt, Arkadii Ivanov, Hae Kun Jung, Gennady Kantakov, Anton Khleborodov, Chrys Neville,  
489 Vladimir Radchenko, Igor Shurpa, Alexander Slabinsky, Shigehiko Urawa, Anna Vazhova, Vishnu Suseelan ,  
490 Charles Waters, Laurie Weitkamp, and Mikhail Zuev. The crew of the research vessel Professor Kaganovskiy.  
491 Charles Waters for providing an R script for catch visualization. Chrys Neville for the contribution of catch data.  
492 This research was supported by Pacific Salmon Commission, Pacific Salmon Foundation, and Fisheries and  
493 Oceans Canada and the Canadian Coast Guard (DFO CCG). CMD was supported by a fellowship through the  
494 Pacific Salmon Foundation and MITACS.

495

## 496 References

- 497 Beacham, Terry D., Colin G. Wallace, Kim Jonsen, Brenda McIntosh, John R. Candy, Eric B. Rondeau, Jean-Sébastien Moore,  
498 Louis Bernatchez, and Ruth E. Withler. 2020. "Accurate Estimation of Conservation Unit Contribution to Coho Salmon  
499 Mixed-Stock Fisheries in British Columbia, Canada Using Direct DNA Sequencing for Single Nucleotide  
500 Polymorphisms." *Canadian Journal of Fisheries and Aquatic Sciences. Journal Canadien Des Sciences Halieutiques et*  
501 *Aquatiques*, no. ja. <https://www.nrcresearchpress.com/doi/abs/10.1139/cjfas-2019-0339>.
- 502 Beacham, Terry D., Colin Wallace, Cathy MacConnachie, Kim Jonsen, Brenda McIntosh, John R. Candy, Robert H. Devlin,  
503 and Ruth E. Withler. 2017. "Population and Individual Identification of Coho Salmon in British Columbia through  
504 Parentage-Based Tagging and Genetic Stock Identification: An Alternative to Coded-Wire Tags." *Canadian Journal of*  
505 *Fisheries and Aquatic Sciences. Journal Canadien Des Sciences Halieutiques et Aquatiques* 74 (9): 1391–1410.
- 506 Beacham, Terry D., Colin Wallace, Cathy MacConnachie, Kim Jonsen, Brenda McIntosh, John R. Candy, and Ruth E. Withler.  
507 2018. "Population and Individual Identification of Chinook Salmon in British Columbia through Parentage-Based  
508 Tagging and Genetic Stock Identification with Single Nucleotide Polymorphisms." *Canadian Journal of Fisheries and*  
509 *Aquatic Sciences. Journal Canadien Des Sciences Halieutiques et Aquatiques* 75 (7): 1096–1105.
- 510 Campbell, Nathan R., Stephanie A. Harmon, and Shawn R. Narum. 2015. "Genotyping-in-Thousands by Sequencing (GT-  
511 Seq): A Cost Effective SNP Genotyping Method Based on Custom Amplicon Sequencing." *Molecular Ecology Resources*  
512 15 (4): 855–67.
- 513 Cederholm, C. Jeff, Matt D. Kunze, Takeshi Murota, and Atuhiro Sibatani. 1999. "Pacific Salmon Carcasses: Essential  
514 Contributions of Nutrients and Energy for Aquatic and Terrestrial Ecosystems." *Fisheries* 24 (10): 6–15.
- 515 Cook, Rodney C., and I. Guthrie. 1987. "In-Season Stock Identification of Sockeye Salmon (*Oncorhynchus Nerka*) Using  
516 Scale Pattern Recognition." *Canadian Special Publication of Fisheries and Aquatic sciences/Publication Speciale*  
517 *Canadienne Des Sciences Halieutiques et Aquatiques* 96: 327–34.
- 518 Cornelis, Senne, Yannick Gansemans, Lieselot Deleye, Dieter Deforce, and Filip Van Nieuwerburgh. 2017. "Forensic SNP  
519 Genotyping Using Nanopore MinION Sequencing." *Scientific Reports* 7 (February): 41759.
- 520 Gilbey, John, Vidar Wennevik, Ian R. Bradbury, Peder Fiske, Lars Petter Hansen, Jan Arge Jacobsen, and Ted Potter. 2017.  
521 "Genetic Stock Identification of Atlantic Salmon Caught in the Faroese Fishery." *Fisheries Research* 187 (March): 110–  
522 19.
- 523 Hinch, S. G., S. J. Cooke, A. P. Farrell, K. M. Miller, M. Lapointe, and D. A. Patterson. 2012. "Dead Fish Swimming: A Review of  
524 Research on the Early Migration and High Premature Mortality in Adult Fraser River Sockeye Salmon *Oncorhynchus*  
525 *Nerka*." *Journal of Fish Biology* 81 (2): 576–99.
- 526 Holtby, L. Blair, Bruce C. Andersen, and Ronald K. Kadowaki. 1990. "Importance of Smolt Size and Early Ocean Growth to  
527 Interannual Variability in Marine Survival of Coho Salmon (*Oncorhynchus Kisutch*)." *Canadian Journal of Fisheries*  
528 *and Aquatic Sciences. Journal Canadien Des Sciences Halieutiques et Aquatiques* 47 (11): 2181–94.
- 529 Jefferts, K. B., P. K. Bergman, and H. F. Fiscus. 1963. "A Coded Wire Identification System for Macro-Organisms." *Nature*  
530 198 (4879): 460–62.
- 531 Lichatowich, Jim. 2001. *Salmon Without Rivers: A History Of The Pacific Salmon Crisis*. Island Press.
- 532 Li, Heng, and Richard Durbin. 2009. "Fast and Accurate Short Read Alignment with Burrows–Wheeler Transform."  
533 *Bioinformatics* 25 (14): 1754–60.
- 534 Li, Heng, Bob Handsaker, Alec Wysoker, Tim Fennell, Jue Ruan, Nils Homer, Gabor Marth, Goncalo Abecasis, Richard  
535 Durbin, and 1000 Genome Project Data Processing Subgroup. 2009. "The Sequence Alignment/Map Format and  
536 SAMtools." *Bioinformatics* 25 (16): 2078–79.
- 537 Mikheyev, Alexander S., and Mandy M. Y. Tin. 2014. "A First Look at the Oxford Nanopore MinION Sequencer." *Molecular*  
538 *Ecology Resources* 14 (6): 1097–1102.
- 539 Miller, Kristina M., Amy Teffer, Strahan Tucker, Shaorong Li, Angela D. Schulze, Marc Trudel, Francis Juanes, et al. 2014.  
540 "Infectious Disease, Shifting Climates, and Opportunistic Predators: Cumulative Factors Potentially Impacting Wild  
541 Salmon Declines." *Evolutionary Applications* 7 (7): 812–55.
- 542 Miller, Kristina M., Ruth E. Withler, and Terry D. Beacham. 1996. "Stock Identification of Coho Salmon (*Oncorhynchus*  
543 *Kisutch*) Using Minisatellite DNA Variation." *Canadian Journal of Fisheries and Aquatic Sciences. Journal Canadien Des*  
544 *Sciences Halieutiques et Aquatiques* 53 (1): 181–95.
- 545 Moran, Benjamin M., and Eric C. Anderson. 2019. "Bayesian Inference from the Conditional Genetic Stock Identification  
546 Model." *Canadian Journal of Fisheries and Aquatic Sciences. Journal Canadien Des Sciences Halieutiques et Aquatiques*  
547 76 (4): 551–60.
- 548 Ozerov, Mikhail, Anti Vasemägi, Vidar Wennevik, Rogelio Diaz-Fernandez, Matthew Kent, John Gilbey, Sergey Prusov, Eero  
549 Niemelä, and Juha-Pekka Vähä. 2013. "Finding Markers That Make a Difference: DNA Pooling and SNP-Arrays Identify  
550 Population Informative Markers for Genetic Stock Identification." *PloS One* 8 (12): e82434.
- 551 Paradis, Emmanuel, and Klaus Schliep. 2019. "Ape 5.0: An Environment for Modern Phylogenetics and Evolutionary  
552 Analyses in R." *Bioinformatics* 35 (3): 526–28.
- 553 Quick, Joshua, Nicholas J. Loman, Sophie Duraffour, Jared T. Simpson, Ettore Severi, Lauren Cowley, Joseph Akoi Bore, et  
554 al. 2016. "Real-Time, Portable Genome Sequencing for Ebola Surveillance." *Nature* 530 (7589): 228–32.

- 555 Robinson, James T., Helga Thorvaldsdóttir, Wendy Winckler, Mitchell Guttman, Eric S. Lander, Gad Getz, and Jill P.  
556 Mesirov. 2011. "Integrative Genomics Viewer." *Nature Biotechnology* 29 (1): 24–26.
- 557 Schlecht, Ulrich, Janine Mok, Carolina Dallett, and Jan Berka. 2017. "ConcatSeq: A Method for Increasing Throughput of  
558 Single Molecule Sequencing by Concatenating Short DNA Fragments." *Scientific Reports* 7 (1): 5252.
- 559 Wood, Chris C., Dennis T. Rutherford, and Skip McKinnell. 1989. "Identification of Sockeye Salmon (*Oncorhynchus Nerka*)  
560 Stocks in Mixed-Stock Fisheries in British Columbia and Southeast Alaska Using Biological Markers." *Canadian*  
561 *Journal of Fisheries and Aquatic Sciences. Journal Canadien Des Sciences Halieutiques et Aquatiques* 46 (12): 2108–20.
- 562 Woodey, J. C. 1987. "In-Season Management of Fraser River Sockeye Salmon (*Oncorhynchus Nerka*): Meeting Multiple  
563 Objectives." *Sockeye Salmon*, 367–74.

564

## 565 Supplementary materials

566 *Supplementary Table 1: SNP loci excluded from the nanopore analysis*

| Locus              | Reason for exclusion          | Sequence around SNP (bold) |
|--------------------|-------------------------------|----------------------------|
| Oki101119_1006     | No nanopore coverage (length) | TTCC <b>AG</b> /TAATTG     |
| Okipoop5265_175    | No nanopore coverage          | CTCCT <b>G</b> /TGAATA     |
| Ots_U5121_459      | DB error                      | GGAGG <b>A</b> GAGAG       |
| Ots_crRAD26541_169 | No nanopore coverage          | ATGAG <b>T</b> /GTGAGG     |
| Ots_crRAD17527_50  | Deletion/Insertion            | GAGAT_ <b>T</b> TACAC      |
| Oki126160_142      | MNP                           | TGAT <b>CCT</b> /TGAAATT   |
| Okiserpin328_119   | MNP                           | ACAC <b>ATT</b> /GATATTA   |
| Ots_crRAD46081_199 | MNP/ Deletion                 | AACCT <b>GGA</b> /__GGAGG  |
| Ots_crRAD44588_193 | Deletion/Insertion            | GGCTA_ <b>G</b> GA AAA     |
| Oki109651_152      | Homopolymer tract             | TTTTTT <b>T</b> A/TAAGCT   |
| Oki_RAD55690_46    | Homopolymer tract             | AAAG <b>A</b> /CCCCCT      |
| Oki_RAD66922_64    | Homopolymer tract             | ATCA <b>AC</b> /AAATTT     |
| Ots_110201_250     | Homopolymer tract             | CCAA <b>AC</b> /AAATCAAAA  |
| Oki_RAD102786_61   | Homopolymer tract             | AGCT <b>T</b> C/TTTATGC    |
| Ots_crRAD18336_135 | Homopolymer tract             | ATT <b>CCC</b> /TAAGCA     |

567

568 *Supplementary Table 2: Representation of individuals in the queried baseline.*

569

| <i>Reporting Unit</i>                                  | <i>Abbreviation</i> | <i>Individuals</i> |
|--------------------------------------------------------|---------------------|--------------------|
| <i>Russia</i>                                          | <i>Russia</i>       | <i>357</i>         |
| <i>Southeast Alaska</i>                                | <i>SEAK</i>         | <i>814</i>         |
| <i>Alsek River</i>                                     | <i>ALSEK</i>        | <i>96</i>          |
| <i>Lower Stikine</i>                                   | <i>LSTK</i>         | <i>40</i>          |
| <i>Portland Sound-Observatory Inlet-Portland Canal</i> | <i>PORT</i>         | <i>99</i>          |
| <i>Lower Nass</i>                                      | <i>LNASS</i>        | <i>191</i>         |
| <i>Upper Nass</i>                                      | <i>UNASS</i>        | <i>92</i>          |
| <i>Lower Skeena</i>                                    | <i>LSKNA</i>        | <i>287</i>         |
| <i>Skeena Estuary</i>                                  | <i>SKEst</i>        | <i>119</i>         |
| <i>Middle Skeena</i>                                   | <i>MSKNA</i>        | <i>269</i>         |
| <i>Upper Skeena</i>                                    | <i>USKNA</i>        | <i>244</i>         |
| <i>Haida Gwaii-Graham Island Lowlands</i>              | <i>NHG</i>          | <i>467</i>         |
| <i>Haida Gwaii-East</i>                                | <i>EHG</i>          | <i>315</i>         |
| <i>Haida Gwaii-West</i>                                | <i>WHG</i>          | <i>136</i>         |
| <i>Northern Coastal Streams</i>                        | <i>NCS</i>          | <i>1307</i>        |
| <i>Hecate Strait Mainland</i>                          | <i>HecLow+HStr</i>  | <i>409</i>         |

|                                                                                         |                     |       |
|-----------------------------------------------------------------------------------------|---------------------|-------|
| <i>Mussel-Kynoch</i>                                                                    | <i>MusKyn</i>       | 182   |
| <i>Douglas Channel-Kitimat Arm</i>                                                      | <i>DOUG</i>         | 476   |
| <i>Bella Coola-Dean Rivers</i>                                                          | <i>BCD</i>          | 348   |
| <i>Rivers Inlet</i>                                                                     | <i>Rivers</i>       | 368   |
| <i>Smith Inlet</i>                                                                      | <i>Smith</i>        | 212   |
| <i>Southern Coastal Streams-Queen Charlotte Strait-Johnstone Strait-Southern Fjords</i> | <i>SC+SFj</i>       | 599   |
| <i>Homathko-Klinaklini Rivers</i>                                                       | <i>HK</i>           | 174   |
| <i>Georgia Strait Mainland</i>                                                          | <i>SC+GStr</i>      | 162   |
| <i>Howe Sound-Burrard Inlet</i>                                                         | <i>Howe-Burrard</i> | 5093  |
| <i>Nahwitti Lowland</i>                                                                 | <i>Nahwitti</i>     | 993   |
| <i>East Vancouver Island-Georgia Strait</i>                                             | <i>EVI+GStr</i>     | 9221  |
| <i>East Vancouver Island-Johnstone Strait-Southern Fjords</i>                           | <i>EVI+SFj</i>      | 49    |
| <i>West Vancouver Island</i>                                                            | <i>WVI</i>          | 2079  |
| <i>Clayoquot</i>                                                                        | <i>CLAY</i>         | 343   |
| <i>Juan de Fuca-Pachena</i>                                                             | <i>JdF</i>          | 2310  |
| <i>Upper Fraser</i>                                                                     | <i>UFR</i>          | 45    |
| <i>Lower Fraser</i>                                                                     | <i>LFR</i>          | 10368 |
| <i>Lillooet</i>                                                                         | <i>LILL</i>         | 235   |

|                             |               |      |
|-----------------------------|---------------|------|
| <i>Fraser Canyon</i>        | <i>FRCany</i> | 175  |
| <i>Interior Fraser</i>      | <i>IntrFR</i> | 288  |
| <i>Lower Thompson</i>       | <i>LTHOM</i>  | 589  |
| <i>North Thompson</i>       | <i>NTHOM</i>  | 1276 |
| <i>South Thompson</i>       | <i>STHOM</i>  | 1509 |
| <i>Boundary Bay</i>         | <i>BB</i>     | 591  |
| <i>Northern Puget Sound</i> | <i>NPS</i>    | 296  |
| <i>Mid-Puget Sound</i>      | <i>MPS</i>    | 233  |
| <i>Skagit River</i>         | <i>SKAG</i>   | 277  |
| <i>Southern Puget Sound</i> | <i>SPS</i>    | 272  |
| <i>Juan de Fuca Strait</i>  | <i>JUAN</i>   | 145  |
| <i>Northern Washington</i>  | <i>NOWA</i>   | 196  |
| <i>Hood Canal</i>           | <i>HOOD</i>   | 167  |
| <i>Coastal Washington</i>   | <i>COWA</i>   | 369  |
| <i>Columbia River</i>       | <i>CR</i>     | 608  |
| <i>Oregon</i>               | <i>OR</i>     | 511  |
